# Supplementary material for: An innovative electrochemical immuno-platform towards ultra-sensitive monitoring of 2-arachidonoyl glycerol in samples from rats with sleep deprivation: bioanalysis of endogenous cannabinoids using biosensor technology
Source: Royal Society of Chemistry journal article supplement (doi:10.1039/d2ra00380e), 2022-01-01
Supplement: d2ra00380e1.pdf [file d2ra00380e1.pdf]

## Supporting Information

### **An innovative electrochemical immuno-platform towards ultra-sensitive monitoring of 2-Arachidonoyl glycerol in rat samples with sleep deprivation: Bioanalysis of endogenous cannabinoids using biosensor technology**

Fereshteh Kohansal <sup>a,1</sup>, Ahmad Mobed <sup>b,c,1</sup>, Rana Ansari <sup>d</sup>, Mohammad Hasanzadeh <sup>a,e,\*</sup>, Ali.

Ahmadalipour <sup>f\*</sup>, Nasrin Shadjou <sup>g</sup>

<sup>a</sup> Pharmaceutical Analysis Research Center, Tabriz University of Medical Sciences, Iran.

<sup>b</sup> Aging Research Institute, Faculty of Medicine, Tabriz University of Medical Sciences, Iran

<sup>c</sup> Physical Medicine and Rehabilitation Research Center, Tabriz University of Medical Sciences, Tabriz, Iran.

<sup>d</sup> Drug Applied Research Center, Tabriz University of Medical Sciences, Iran.

<sup>a</sup> Nutrition Research Center, Tabriz University of Medical Sciences, Tabriz, Iran

<sup>f</sup> Research Center of Psychiatry and Behavioral Sciences, Tabriz University of Medical Sciences, Iran.

<sup>g</sup> Department of Nanochemistry, Nanotechnology Research Center, Faculty of Science and Chemistry, Urmia University, Urmia, Iran.

Corresponding author:

Pharmaceutical Analysis Research Center, Tabriz University of Medical Sciences, Tabriz 51664, Iran. [hasanzadehm@tbzmed.ac.ir](mailto:hasanzadehm@tbzmed.ac.ir)

Research Center of Psychiatry and Behavioral Sciences, Tabriz University of Medical Sciences, Iran. [ali.ahmadalipour1@gmail.com](mailto:ali.ahmadalipour1@gmail.com)

<sup>1</sup> Co-first author: Equal contribution.

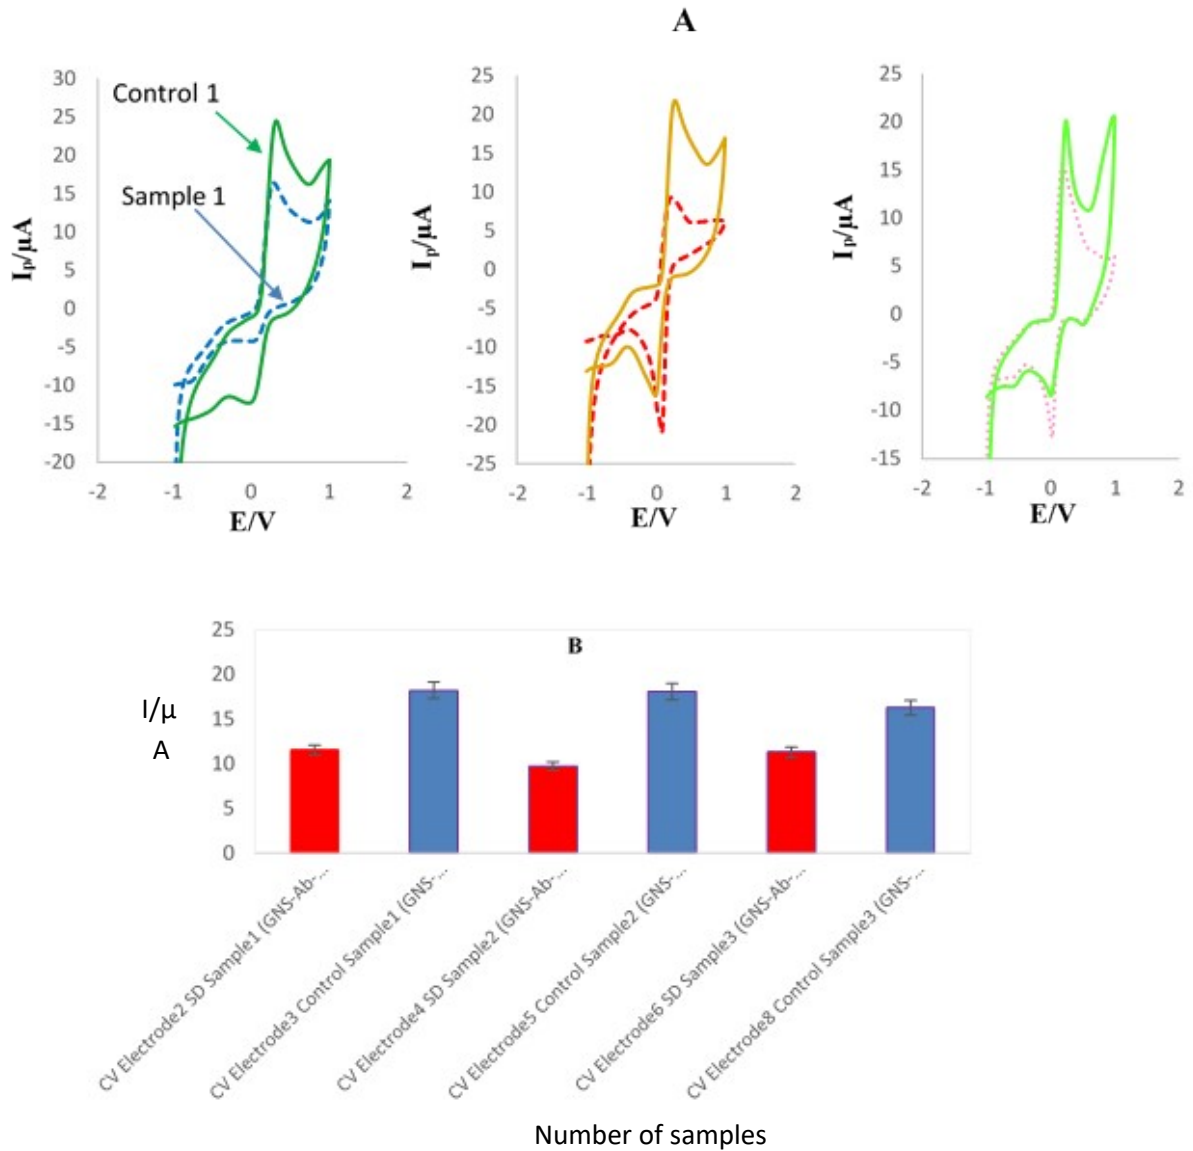

**Fig. S1. (A)** CVs of engineered immunosensor in the presence of various serum samples of rat before and after depression process. Information;  $E_{begin}$ : -1.0 V,  $E_{vertex1}$ : 1.0 V,  $E_{vertex2}$ : -1.0 V,  $E_{step}$ : 0.01 V, scan rate: 0.1 V/s. **(B)** Histogram of peak current *versus* type of serum sample of rat (RSD= 2.42%, n=6).

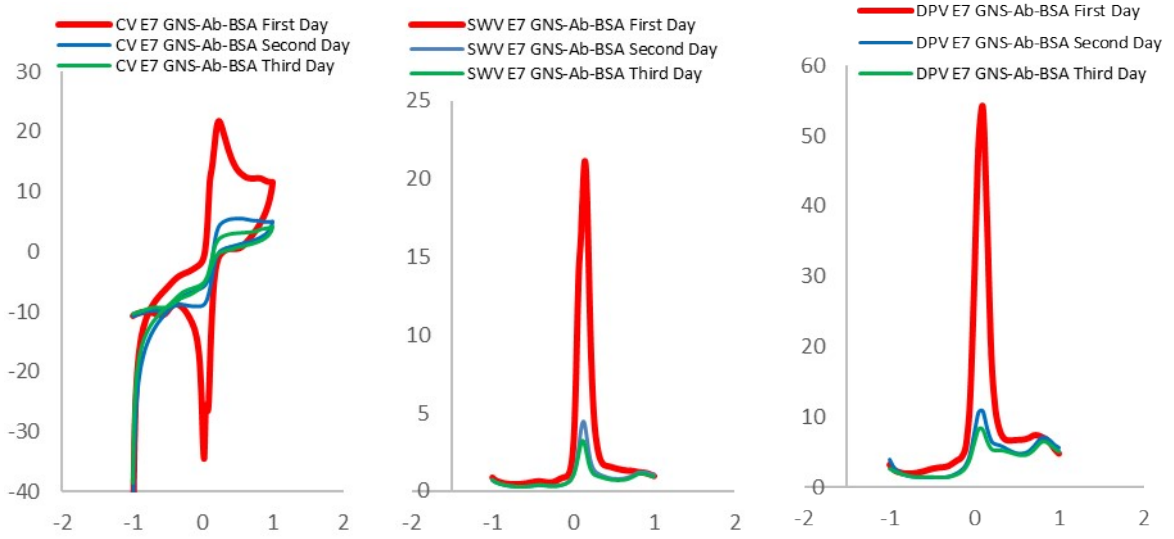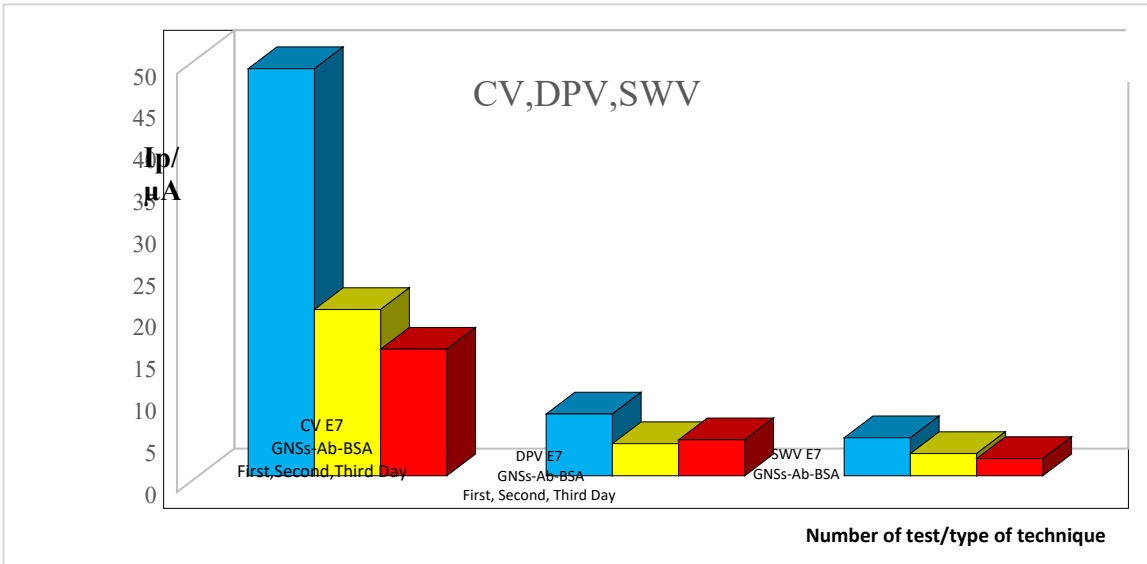

**Fig. S2.** Inter-day Stability of engineered immunosensor. Experimental condition is similar to Fig. 1.

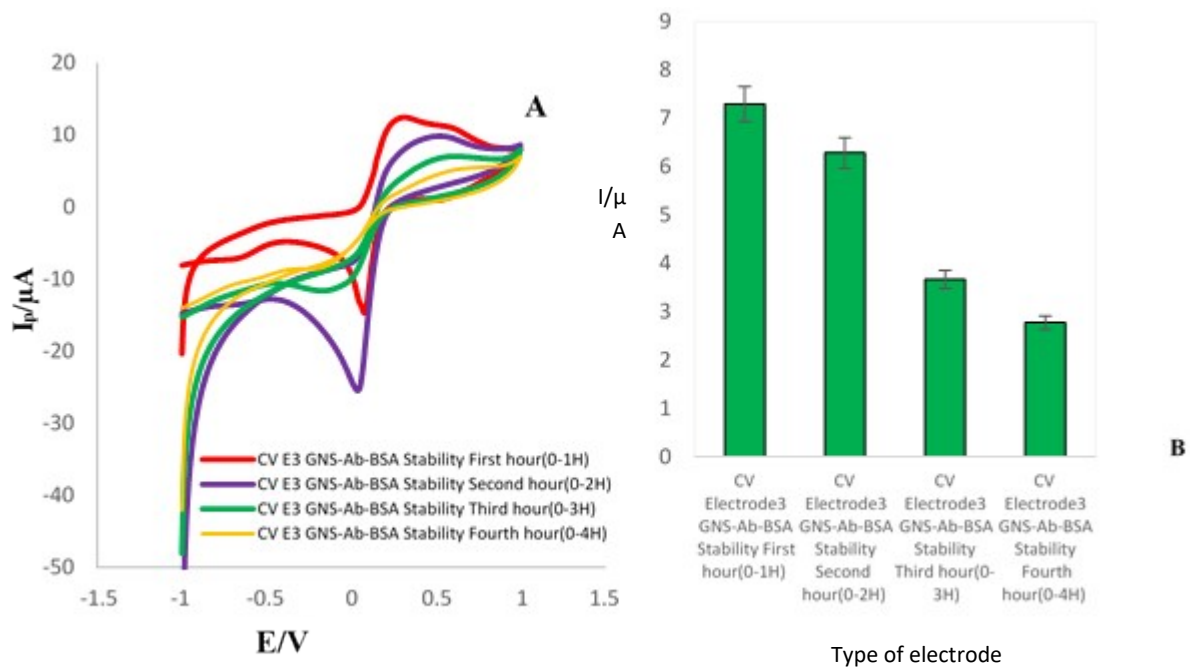

**Fig. S3. A)** CVs of engineered immunosensor in different time of storage (1, 2, 3, and 4 h). **(B)** Histogram of peak current versus time of incubation (RSD= 3.68%, n=3).

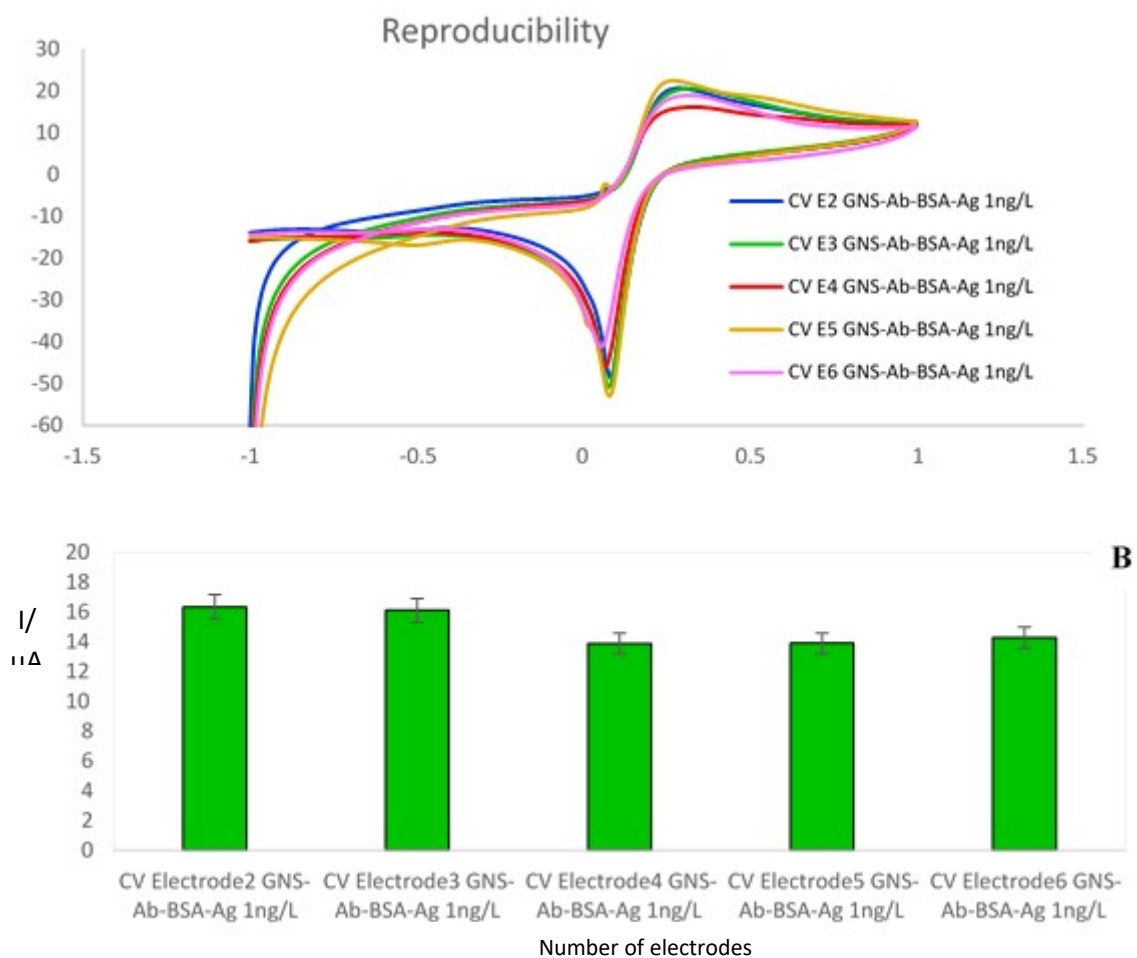

**Fig. S4.** Reproducibility of developed immunosensor, (A) CV of five electrode prepared in similar condition;  $E_{\text{begin}}$ : -1.0 V,  $E_{\text{vertex1}}$ : 1.0 V,  $E_{\text{vertex2}}$ : -1.0 V,  $E_{\text{step}}$ : 0.01 V, scan rate: 0.1 V/s, in the  $\text{K}_4\text{Fe}(\text{CN})_6/\text{K}_3\text{Fe}(\text{CN})_6$  solution, (B) Dependency of peak current *versus* type of electrode (RSD= 0.73%, n=5).

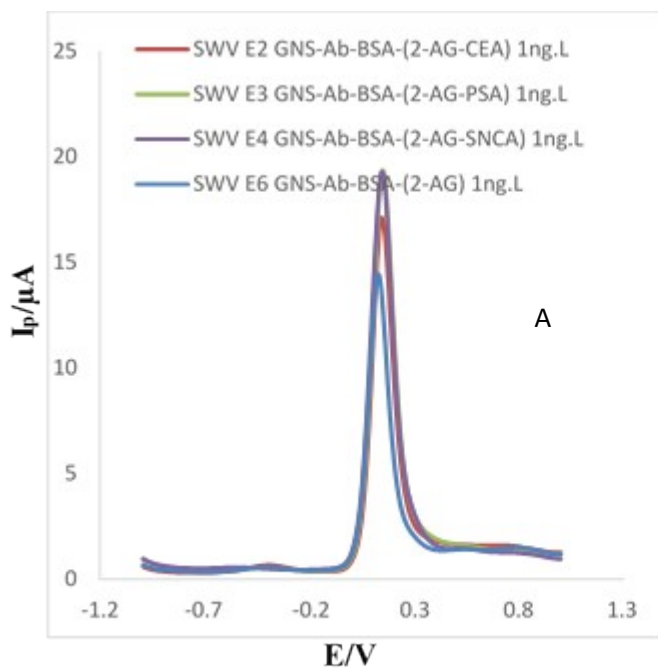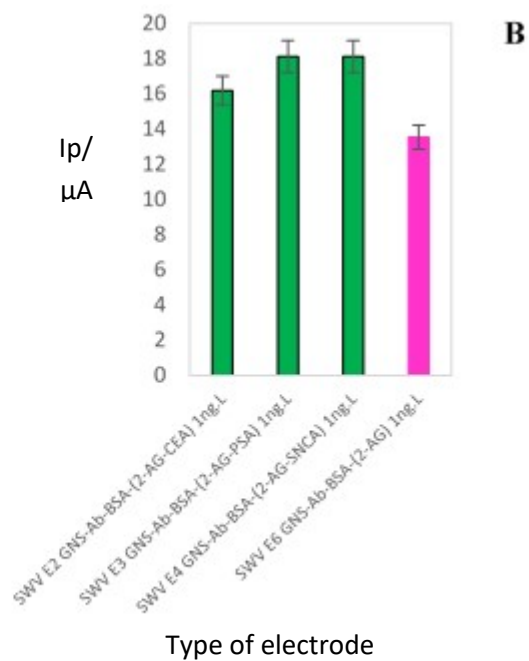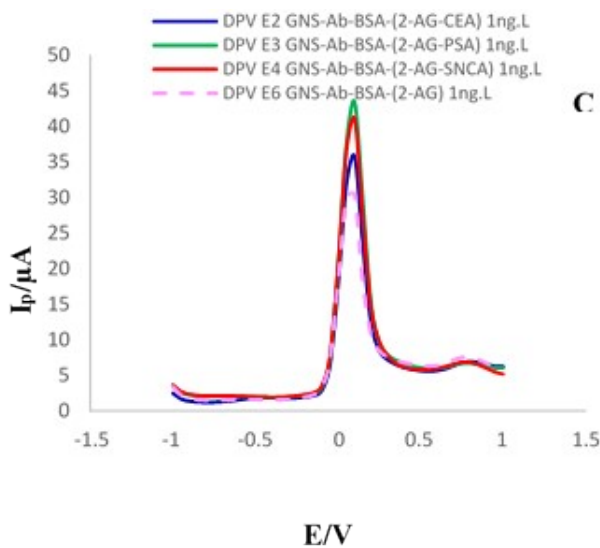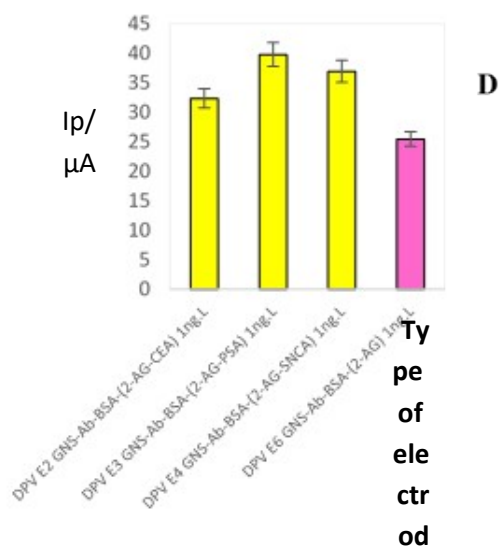

**Fig. S5.** Selectivity study of designed immunosensor in the presence of three interfere agent (PSA, CEA, SNCA). Experimental conditions are similar to legend of Fig.1. SWV (A), DPV (C), and (B&D) Histogram of peak current *versus* type of interfere species. (RSD=1.95%, n=3).
